# Supplementary material for: Copper-mediated difluoromethylation of electron-poor aryl iodides at room temperature
Source: Royal Society of Chemistry journal article supplement (doi:10.1039/c4qo00153b), 2014-06-20

# **Copper-Mediated Difluoromethylation of Aryl and Vinyl Iodides at Room Temperature**

Xueliang Jiang<sup>1</sup>, Zeng-Hao Chen<sup>1</sup>, Xiuhua Xu<sup>\*1</sup> and Fengling Qing<sup>\*1,2</sup>

Address: <sup>1</sup>Key Laboratory of Organofluorine Chemistry, Shanghai Institute of Organic Chemistry, Chinese Academy of Sciences, 345 Lingling Lu, Shanghai 200032, China and <sup>2</sup>College of Chemistry, Chemical Engineering and Biotechnology, Donghua University, 2999 North Renmin Lu, Shanghai 201620, China

Email: Fengling Qing\* - flq@sioc.ac.cn

**Experimental details, characterization data of all products, and copies of NMR spectra.**

## **Table of Contents**

|                                                                                                              |          |
|--------------------------------------------------------------------------------------------------------------|----------|
| General Information-----                                                                                     | pages S2 |
| Preparation of Substrates-----                                                                               | pages S2 |
| General Procedure for Copper-Mediated Difluoromethylation of Aryl and Vinyl Iodides at Room Temperature----- | pages S2 |
| References-----                                                                                              | pages S2 |
| NMR Spectra of Products-----                                                                                 | pages S6 |

## General Information:

$^1\text{H}$  NMR (TMS as the internal standard) and  $^{19}\text{F}$  NMR spectra ( $\text{CFCl}_3$  as the outside standard and low field is positive) were recorded on a Bruker AM300 or Bruker AM400 spectrometer.  $^{13}\text{C}$  NMR was recorded on a Bruker AM400 spectrometer. Chemical shifts ( $\delta$ ) are reported in ppm, and coupling constants ( $J$ ) are in Hertz (Hz). The following abbreviations were used to explain the multiplicities: s = singlet, d = doublet, t = triplet, q = quartet, m = multiplet, br = broad. Substrates were purchased from commercial sources (Aldrich, Alfa and Chemical Reagent Companies of China) and used as received. Reactions were performed under an atmosphere of nitrogen using glassware that was flame-dried under vacuum. Isopropyl 4-iodobenzenesulfonate (**1f**)<sup>1</sup> was prepared according to literature procedures. Compounds **2a**<sup>2</sup>, **2c**<sup>2</sup>, **2e**<sup>2</sup>, **4b**<sup>3</sup>, **4c**<sup>3</sup>, **6a**<sup>3</sup> and **6b**<sup>3</sup> have been published previously.

## General Procedure for Copper-Mediated Difluoromethylation of Aryl and Vinyl Iodides at Room Temperature:

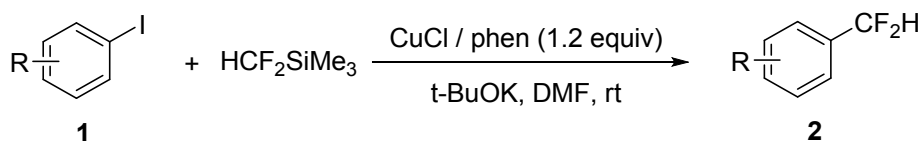

To a Shchlenk tube equipped with a magnetic stir bar were added  $\text{CuCl}$  (1.2 mmol) and  $t\text{-BuOK}$  (2.4 mmol) were added under  $\text{N}_2$  atmosphere. DMF (3.0 mL) was added to the tube. After stirring for 5 minutes,  $\text{HCF}_2\text{SiMe}_3$  (2.4 mmol) was added to the mixture. The resulting mixture was stirred for 15 minutes and then phen (1.2 mmol) dissolved in DMF (2.0 mL) was added. After stirring for another 10 minutes, aryl iodides (1.0 mmol) was added to the mixture under  $\text{N}_2$  atmosphere. The reaction mixture was kept at rt for 4 hours and then diluted with diethyl ether, washed with water and brine, dried over sodium sulfate, and concentrated. The crude products were purified by column chromatography on silica gel to give the corresponding products.

## References

1. Kunst, E.; Gallier, F.; Dujardin, G.; Yusubov, M. S.; Kirschning, A. *Org. Lett.* **2007**, *9*, 5199.
2. Fujikawa, K.; Fujioka, Y.; Kobayashi, A.; Amii, H. *Org. Lett.* **2011**, *13*, 5560.
3. Prakash, G. K. S.; Ganesh, S. K.; Jones, J.-P.; Kulkarni, A.; Masood, K.; Swabeck, J. K.; Olah, G. A. *Angew. Chem. Int. Ed.* **2012**, *51*, 12090.

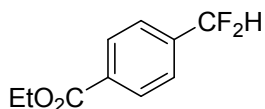

**Ethyl 4-(difluoromethyl)benzoate (2a):** Colorless liquid; yield 80%.  $^1\text{H}$  NMR (300 MHz,  $\text{CDCl}_3$ )  $\delta$  ppm 8.13 (d,  $J = 8.4$  Hz, 2H), 7.59 (d,  $J = 8.0$  Hz, 2H), 6.70 (t,  $J = 56.4$  Hz, 1H), 4.41 (q,  $J = 7.6$  Hz, 2H), 1.41 (t,  $J = 7.2$  Hz, 3H).  $^{19}\text{F}$  NMR (282 MHz,  $\text{CDCl}_3$ )  $\delta$  ppm  $-112.2$  (d,  $J = 55.6$  Hz, 2F).  $^{13}\text{C}$  NMR (100 MHz,  $\text{CDCl}_3$ )  $\delta$  ppm 165.8, 138.4 (t,  $J = 22.4$  Hz), 132.8, 123.0, 125.7 (t,  $J = 5.3$  Hz), 114.1 (t,  $J = 238.3$  Hz), 61.4, 14.3. IR (thin film)  $\nu$  3069, 1721, 1278, 1107, 1074  $\text{cm}^{-1}$ . MS (EI):  $m/z$  200 ( $\text{M}^+$ ). HRMS Calculated for  $\text{C}_{10}\text{H}_{10}\text{F}_2\text{O}_2$ : 200.0649; Found: 200.0648.

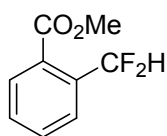

**Methyl 2-(difluoromethyl)benzoate (2b):** Colorless liquid; yield 77%.  $^1\text{H}$  NMR (300 MHz,  $\text{CDCl}_3$ )  $\delta$  ppm 8.04 (d,  $J = 8.0$  Hz, 1H), 7.83 (d,  $J = 8.0$  Hz, 1H), 7.40-7.68 (m, 3H), 3.94 (s, 3H).  $^{19}\text{F}$  NMR (282 MHz,  $\text{CDCl}_3$ )  $\delta$  ppm  $-113.8$  (d,  $J = 54.9$  Hz, 2F).  $^{13}\text{C}$  NMR (100 MHz,  $\text{CDCl}_3$ )  $\delta$  ppm 166.5, 135.4 (t,  $J = 22.0$  Hz), 132.8, 131.0, 130.5 (t,  $J = 2.1$  Hz), 128.8 (t,  $J = 5.0$  Hz), 126.0 (t,  $J = 8.0$  Hz), 112.1 (t,  $J = 236.7$  Hz), 52.6. IR (thin film)  $\nu$  2957, 1726, 1437, 1270, 1143, 1052  $\text{cm}^{-1}$ . MS (EI):  $m/z$  200 ( $\text{M}^+$ ). HRMS Calculated for  $\text{C}_9\text{H}_8\text{F}_2\text{O}_2$ : 186.0492; Found: 186.0489.

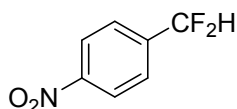

**1-(Difluoromethyl)-4-nitrobenzene (2c):** Yellow liquid; yield 78%.  $^1\text{H}$  NMR (300 MHz,  $\text{CDCl}_3$ )  $\delta$  ppm 8.33 (d,  $J = 8.4$  Hz, 2H), 7.72 (d,  $J = 8.4$  Hz, 2H), 6.75 (t,  $J = 55.8$  Hz, 1H).  $^{19}\text{F}$  NMR (282 MHz,  $\text{CDCl}_3$ )  $\delta$  ppm  $-113.0$  (d,  $J = 55.6$  Hz, 2F).  $^{13}\text{C}$  NMR (100 MHz,  $\text{CDCl}_3$ )  $\delta$  ppm 149.5, 140.3 (t,  $J = 23.5$  Hz), 126.9 (t,  $J = 5.6$  Hz), 124.0, 113.3 (t,  $J = 238.6$  Hz). IR (thin film)  $\nu$  3087, 1529, 1349, 1216, 1077  $\text{cm}^{-1}$ . MS (EI):  $m/z$  173 ( $\text{M}^+$ ). HRMS Calculated for  $\text{C}_7\text{H}_5\text{F}_2\text{NO}_2$ : 173.0288; Found: 173.0286.

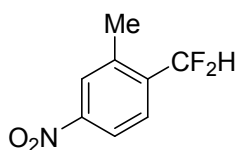

**1-(Difluoromethyl)-2-methyl-4-nitrobenzene (2d):** Yellow liquid; yield 83%.  $^1\text{H}$  NMR (300 MHz,  $\text{CDCl}_3$ )  $\delta$  ppm 8.11-8.14 (m, 2H), 7.71 (d,  $J = 8.1$  Hz, 1H), 6.82 (t,  $J = 55.8$  Hz, 1H). 2.55 (s, 3H).  $^{19}\text{F}$  NMR (282 MHz,  $\text{CDCl}_3$ )  $\delta$  ppm  $-115.3$  (d,  $J = 54.4$  Hz, 2F).  $^{13}\text{C}$  NMR (100 MHz,  $\text{CDCl}_3$ )  $\delta$  ppm 149.1, 138.6 (t,  $J = 4.5$  Hz), 138.2 (t,  $J = 21.1$  Hz), 127.0 (t,  $J = 7.5$  Hz), 125.8, 121.1, 112.9 (t,  $J = 238.0$  Hz), 18.5. IR (thin film)  $\nu$  3081, 1530, 1348, 1186, 1045  $\text{cm}^{-1}$ . MS (EI):  $m/z$  187 ( $\text{M}^+$ ). HRMS Calculated for  $\text{C}_8\text{H}_7\text{F}_2\text{NO}_2$ : 187.0443; Found: 187.0445.

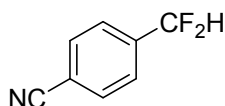

**4-(Difluoromethyl)benzonitrile (2e):** Colorless liquid; yield 82%.  $^1\text{H}$  NMR (300 MHz,  $\text{CDCl}_3$ )  $\delta$  ppm 7.78 (d,  $J = 8.4$  Hz, 2H), 7.65 (d,  $J = 8.4$  Hz, 2H), 6.70 (t,  $J = 55.6$  Hz, 1H).  $^{19}\text{F}$  NMR (282 MHz,  $\text{CDCl}_3$ )  $\delta$  ppm  $-113.2$  (d,  $J = 59.6$  Hz, 2F).  $^{13}\text{C}$  NMR (100 MHz,  $\text{CDCl}_3$ )  $\delta$  ppm 138.6 (t,  $J = 23.2$  Hz), 132.6, 126.4 (t,  $J = 6.9$  Hz), 114.8 (t,  $J = 2.2$  Hz), 118.0, 113.4 (t,  $J = 238.9$  Hz). IR (thin film)  $\nu$  3069, 2234, 1379, 1219, 1078  $\text{cm}^{-1}$ . MS (EI):  $m/z$  153 ( $\text{M}^+$ ). HRMS Calculated for  $\text{C}_8\text{H}_5\text{F}_2\text{N}$ : 153.0390; Found: 153.0388.

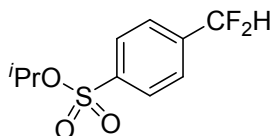

**Isopropyl 4-(difluoromethyl)benzenesulfonate (2f):** Colorless liquid; yield 80%.  $^1\text{H}$  NMR (300 MHz,  $\text{CDCl}_3$ )  $\delta$  ppm 8.02 (d,  $J = 8.1$  Hz, 2H), 7.70 (d,  $J = 8.1$  Hz, 2H), 6.72 (t,  $J = 55.8$  Hz, 1H), 4.79-4.84 (m, 1H), 1.31 (d,  $J = 6.3$  Hz, 6H).  $^{19}\text{F}$  NMR (282 MHz,  $\text{CDCl}_3$ )  $\delta$  ppm  $-112.9$  (d,  $J = 57.3$  Hz, 2F).  $^{13}\text{C}$  NMR (100 MHz,  $\text{CDCl}_3$ )  $\delta$  ppm 139.9 (t,  $J = 2.3$  Hz), 139.2 (t,  $J = 23.8$  Hz), 128.1, 126.6 (t,  $J = 6.6$  Hz), 113.5 (t,  $J = 239.5$  Hz), 78.3, 22.8. IR (thin film)  $\nu$  3066, 1366, 1191, 1085  $\text{cm}^{-1}$ . MS (EI):  $m/z$  250 ( $\text{M}^+$ ). HRMS Calculated for  $\text{C}_{10}\text{H}_{12}\text{F}_2\text{O}_3\text{S}$ : 250.0475; Found: 250.0478.

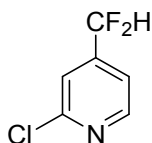

**2-Chloro-4-(difluoromethyl)pyridine (4a):** Colorless liquid; yield 83%.  $^1\text{H}$  NMR (300 MHz,

CDCl<sub>3</sub>)  $\delta$  ppm 8.53 (d,  $J$  = 5.1 Hz, 1H), 7.47 (s, 1H), 7.36 (d,  $J$  = 4.8 Hz, 1H), 6.63 (t,  $J$  = 55.5 Hz, 1H). <sup>19</sup>F NMR (282 MHz, CDCl<sub>3</sub>)  $\delta$  ppm -116.2 (d,  $J$  = 55.0 Hz, 2F). <sup>13</sup>C NMR (100 MHz, CDCl<sub>3</sub>)  $\delta$  ppm 152.4, 150.6, 145.2 (t,  $J$  = 24.6 Hz), 121.0 (t,  $J$  = 7.0 Hz), 118.8 (t,  $J$  = 5.4 Hz), 112.1 (t,  $J$  = 240.7 Hz). IR (thin film)  $\nu$  3069, 1602, 1561, 1367, 1131, 1088 cm<sup>-1</sup>. MS (EI):  $m/z$  163 (M<sup>+</sup>). HRMS Calculated for C<sub>6</sub>H<sub>4</sub>ClF<sub>2</sub>N: 163.0000; Found: 163.9999.

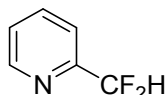

**2-(Difluoromethyl)pyridine (4b):** Yellow liquid; yield 70%. <sup>1</sup>H NMR (300 MHz, CDCl<sub>3</sub>)  $\delta$  ppm 8.67 (d,  $J$  = 4.4 Hz, 1H), 7.85 (d,  $J$  = 7.2 Hz, 1H), 7.65 (d,  $J$  = 7.6 Hz, 1H), 7.42 (d,  $J$  = 6.2 Hz, 1H), 6.65 (t,  $J$  = 54.8 Hz, 1H). <sup>19</sup>F NMR (282 MHz, CDCl<sub>3</sub>)  $\delta$  ppm -115.8 (d,  $J$  = 53.8 Hz, 2F). <sup>13</sup>C NMR (100 MHz, CDCl<sub>3</sub>)  $\delta$  ppm 152.8 (t,  $J$  = 25.2 Hz), 149.5, 137.2, 125.4 (t,  $J$  = 2.2 Hz), 120.1 (t,  $J$  = 2.4 Hz), 113.9 (t,  $J$  = 239.2 Hz).

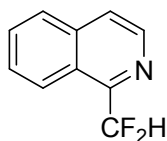

**1-(Difluoromethyl)isoquinoline (4c):** Colorless liquid; yield 93%. <sup>1</sup>H NMR (300 MHz, CDCl<sub>3</sub>)  $\delta$  ppm 8.46-8.51 (m, 2H), 7.64-7.89 (m, 4H), 6.98 (t,  $J$  = 54.3 Hz, 1H). <sup>19</sup>F NMR (282 MHz, CDCl<sub>3</sub>)  $\delta$  ppm -110.0 (d,  $J$  = 54.4 Hz, 2F). <sup>13</sup>C NMR (100 MHz, CDCl<sub>3</sub>)  $\delta$  ppm 151.1 (t,  $J$  = 26.2 Hz), 141.1, 136.9, 130.6, 128.2, 127.3, 125.1, 125.0 (t,  $J$  = 3.8 Hz), 123.5, 117.9 (t,  $J$  = 241.2 Hz). IR (thin film)  $\nu$  3060, 1586, 1370, 1111, 1033 cm<sup>-1</sup>. MS (EI):  $m/z$  179 (M<sup>+</sup>). HRMS Calculated for C<sub>10</sub>H<sub>7</sub>F<sub>2</sub>N: 179.0547; Found: 179.0544.

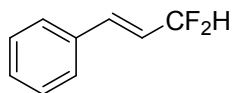

**(E)-(3,3-difluoroprop-1-enyl)benzene (6a):** Colorless liquid; yield 51%. <sup>1</sup>H NMR (400 MHz, CDCl<sub>3</sub>)  $\delta$  ppm 7.41-7.43 (m, 2H), 7.32-7.38 (m, 3H), 6.83-6.89 (m, 1H), 6.08-6.38 (m, 2H). <sup>19</sup>F NMR (376 MHz, CDCl<sub>3</sub>)  $\delta$  ppm -109.6 – -109.8 (m, 2F). MS (EI):  $m/z$  154 (M<sup>+</sup>).

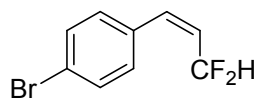

**(Z)-1-bromo-4-(3,3-difluoroprop-1-enyl)benzene (6b):** Colorless liquid; yield 82%.  $^1\text{H}$  NMR (300 MHz,  $\text{CDCl}_3$ )  $\delta$  ppm 7.52 (d,  $J = 8.4$  Hz, 2H), 7.15 (d,  $J = 8.7$  Hz, 2H), 6.86 (d,  $J = 11.7$  Hz, 1H), 6.27 (td,  $J = 55.2$  Hz,  $J = 7.5$  Hz, 1H), 5.85-5.94 (m, 1H).  $^{19}\text{F}$  NMR (282 MHz,  $\text{CDCl}_3$ )  $\delta$  ppm  $-108.2$  (dd,  $J = 55.0$  Hz,  $J = 8.2$  Hz, 2F). MS (EI):  $m/z$  232 ( $\text{M}^+$ ).

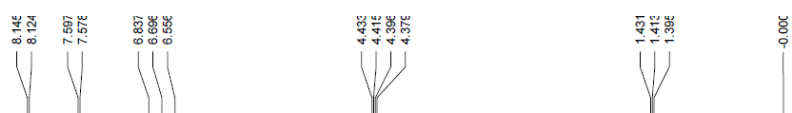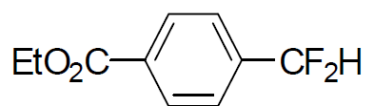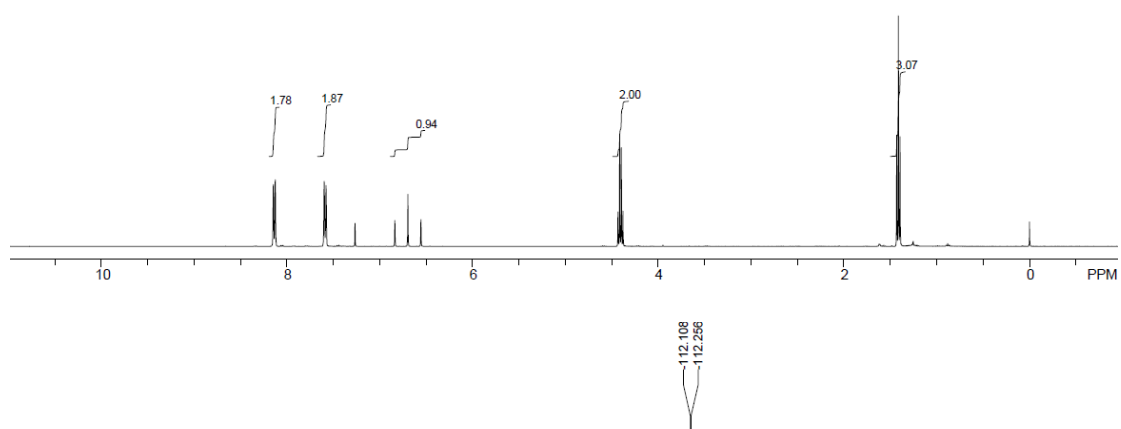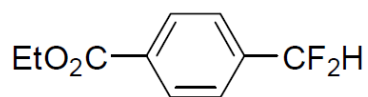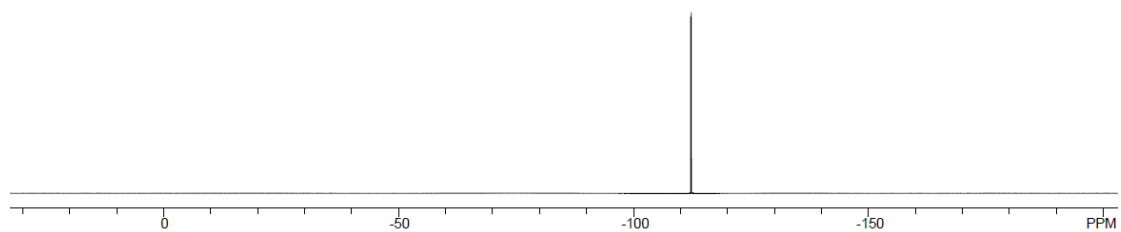

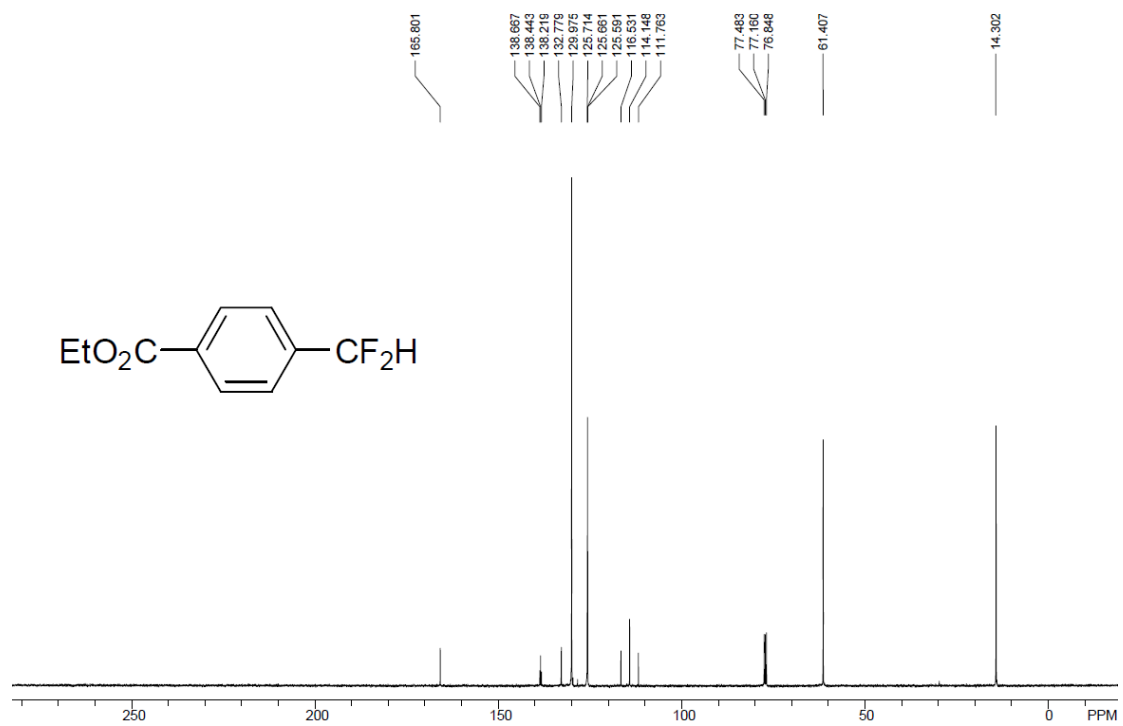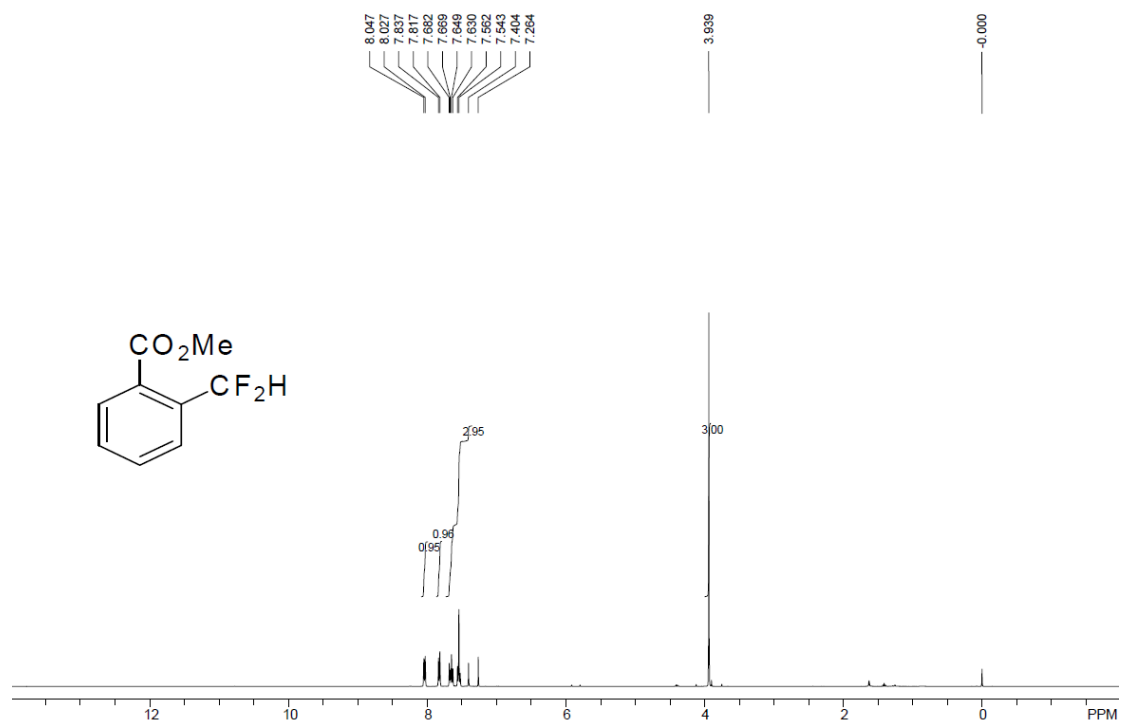

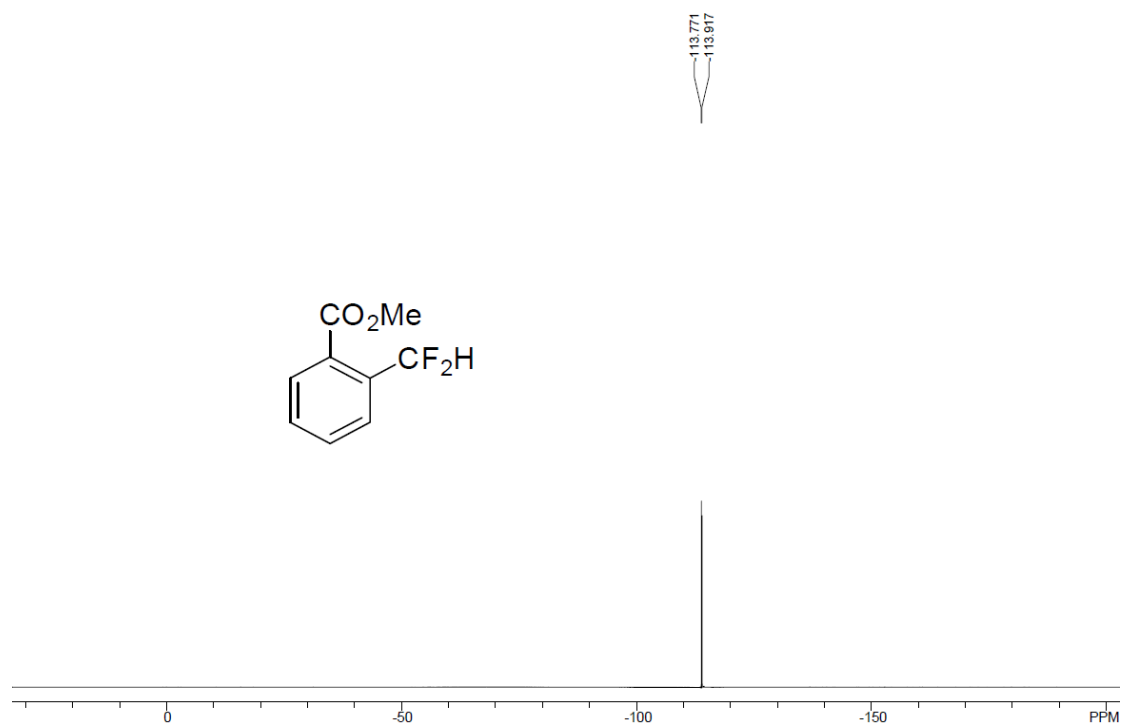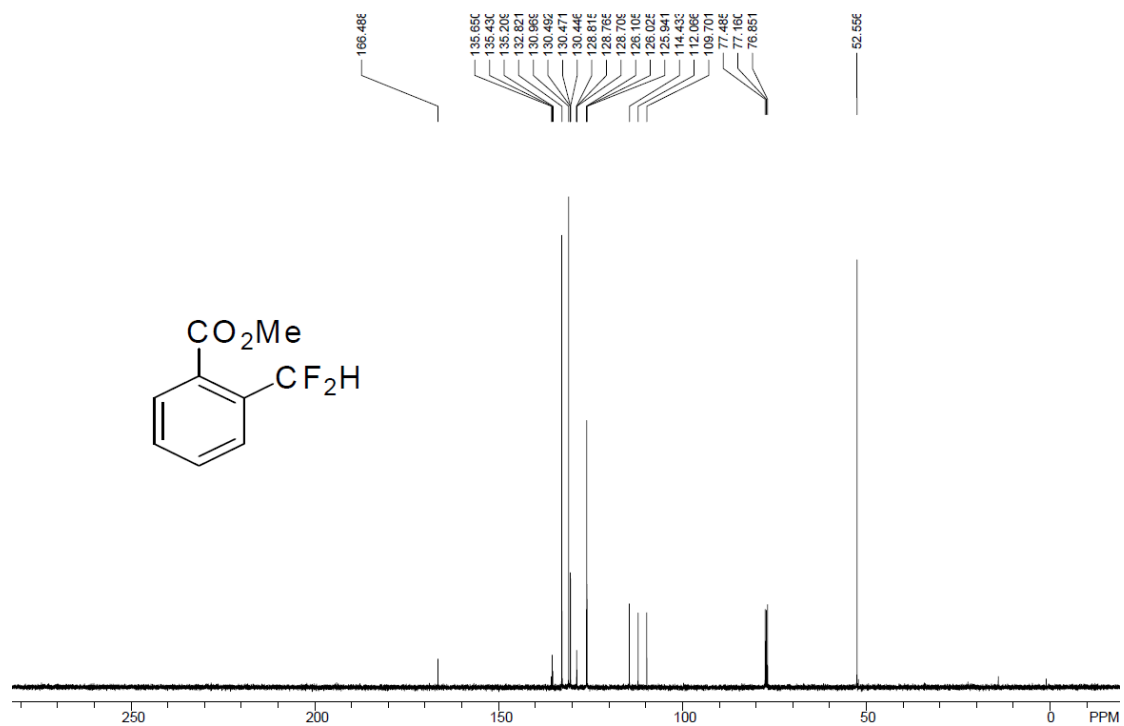

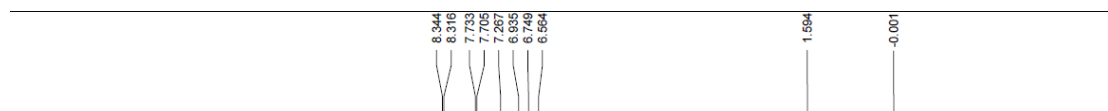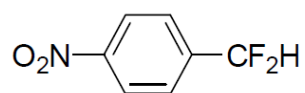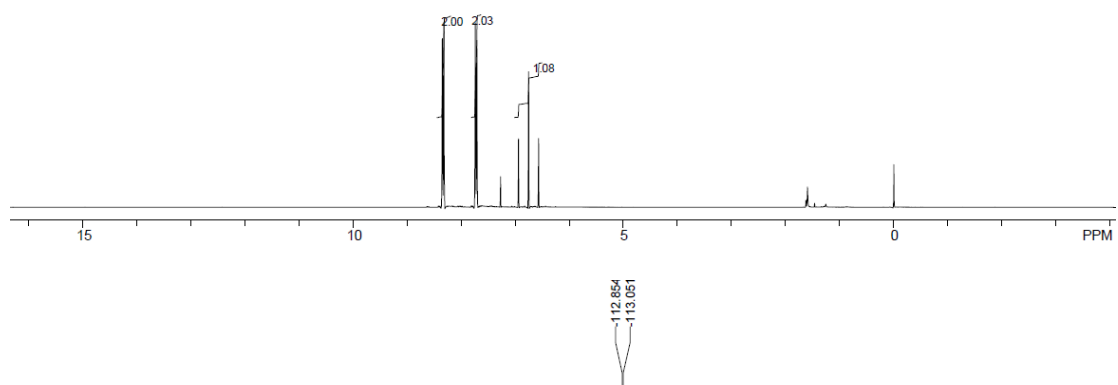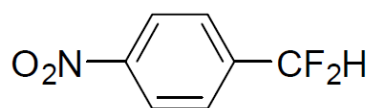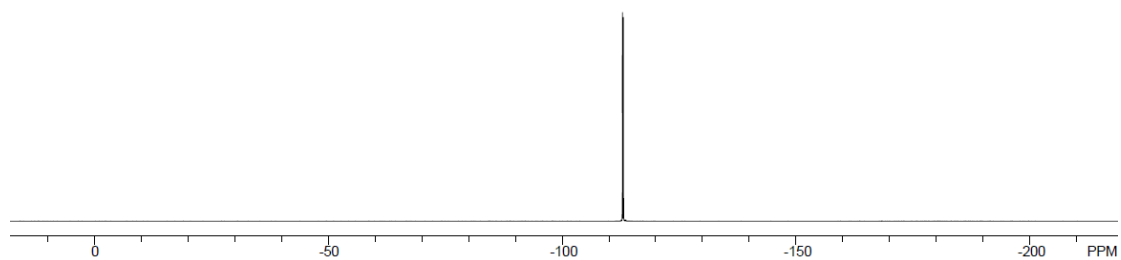

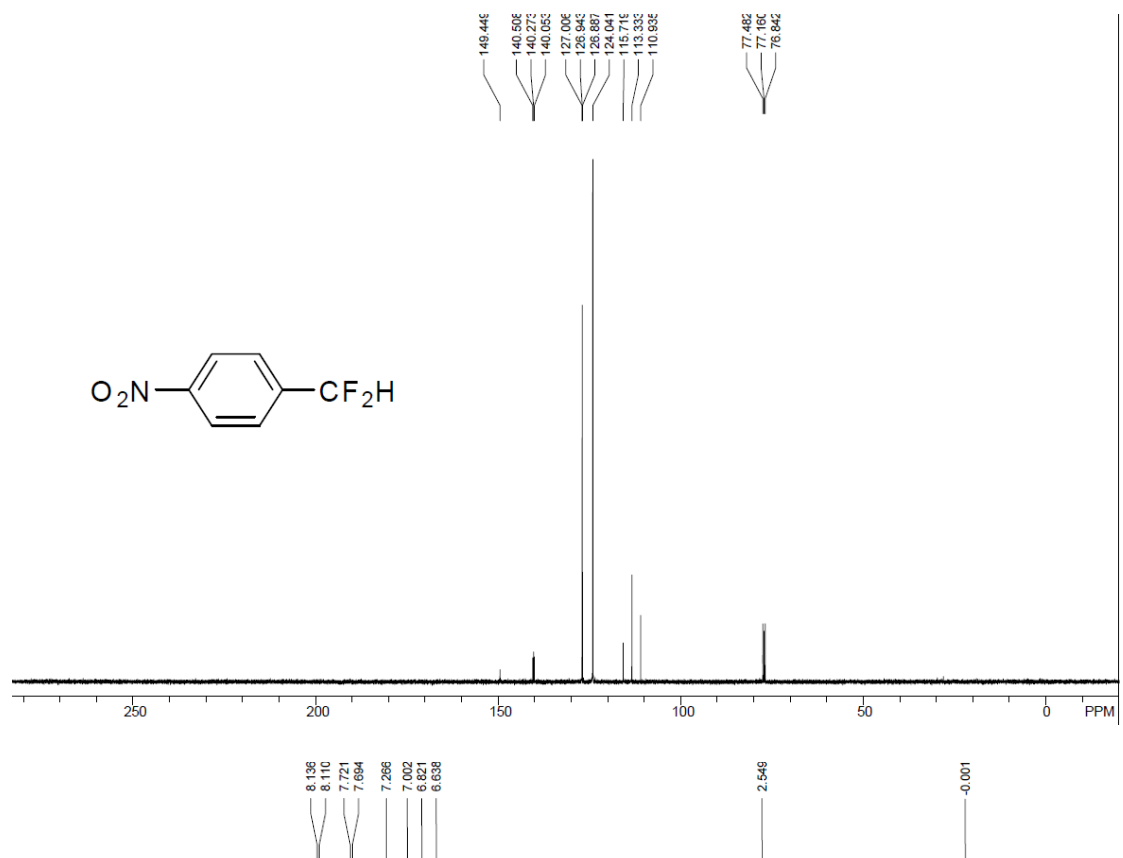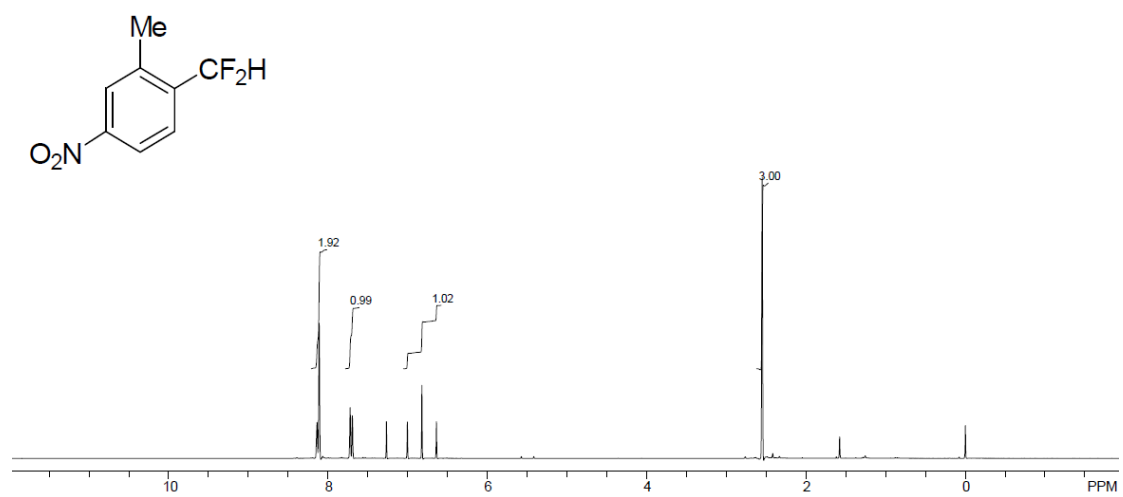

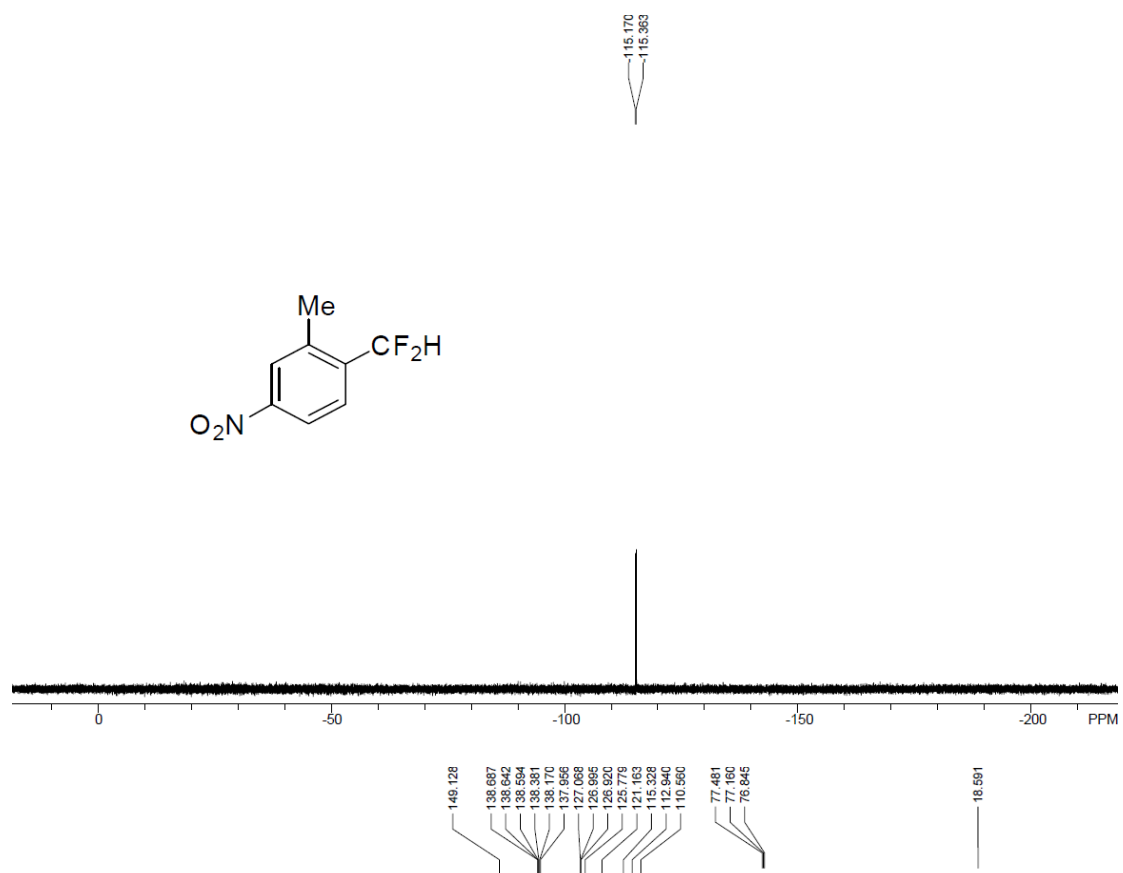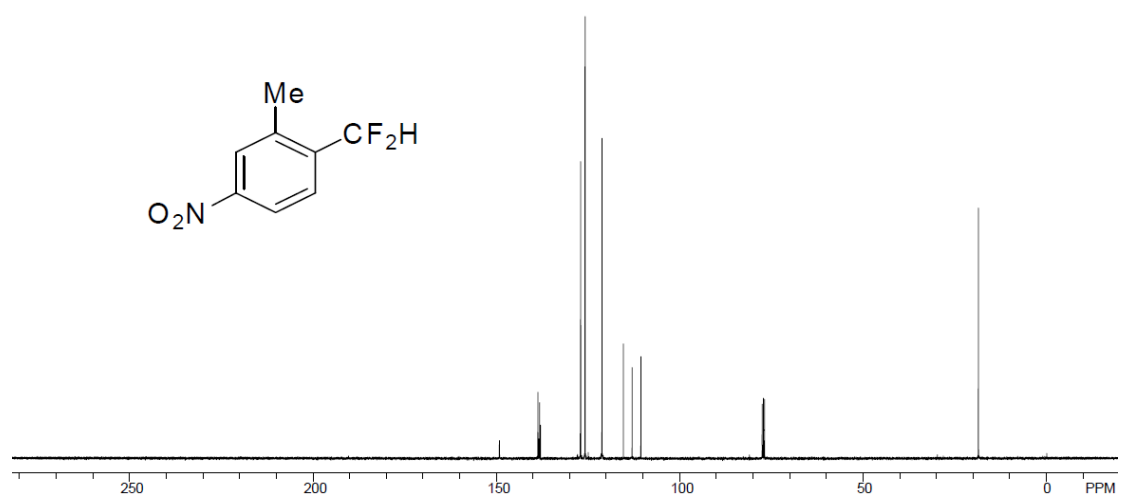

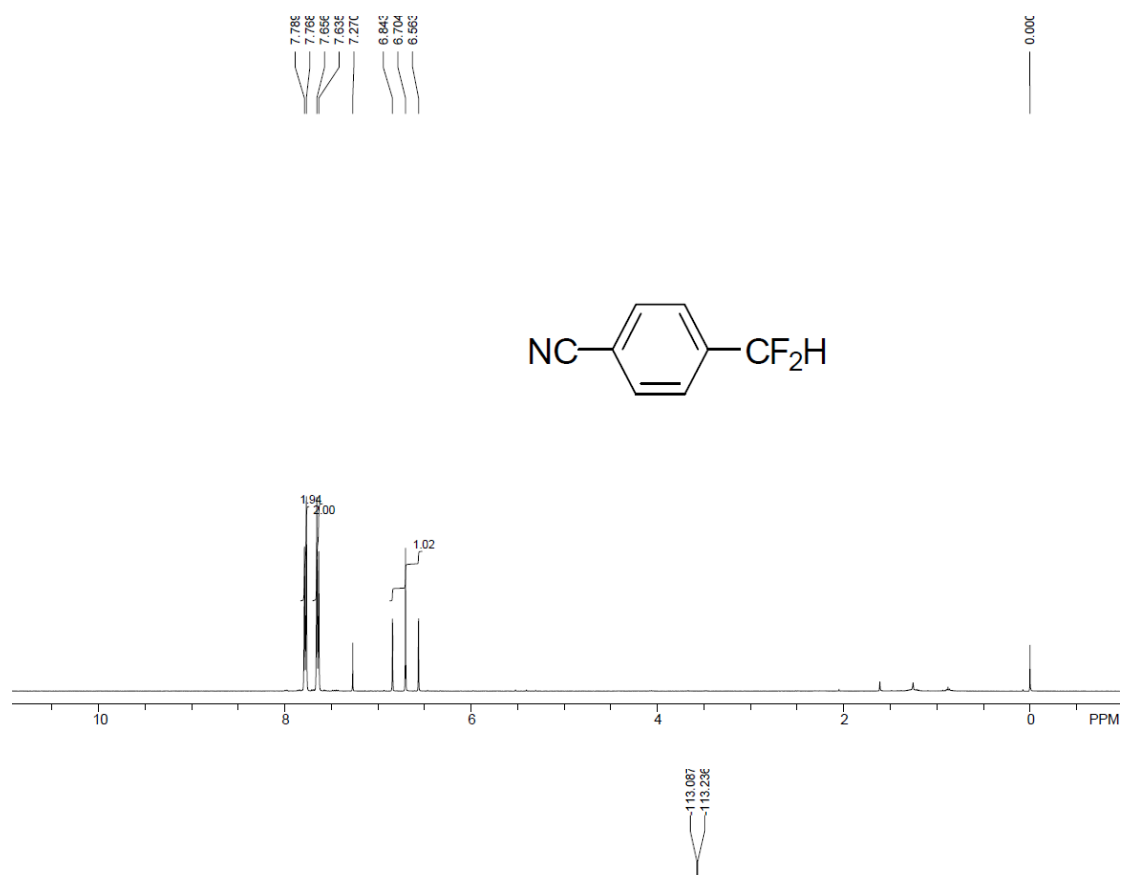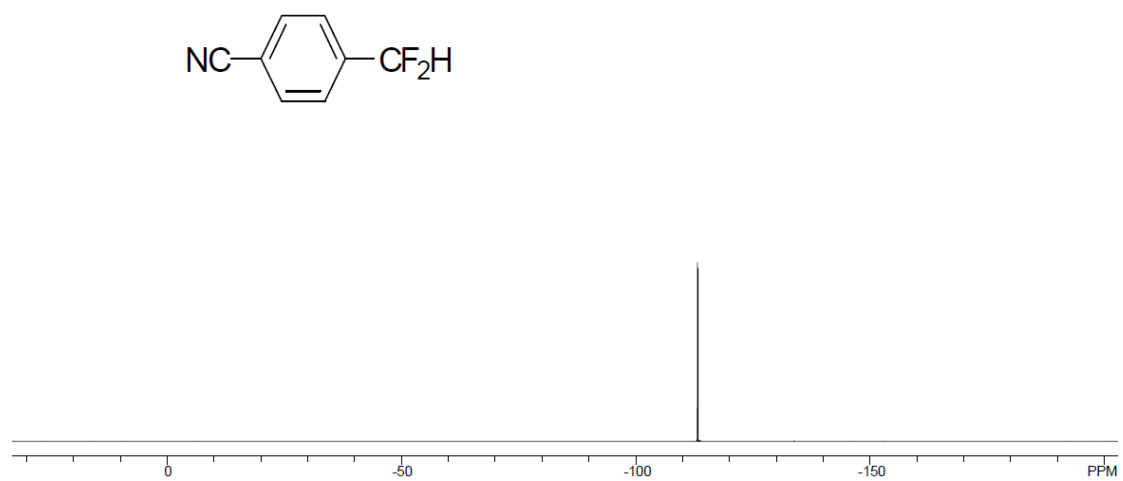

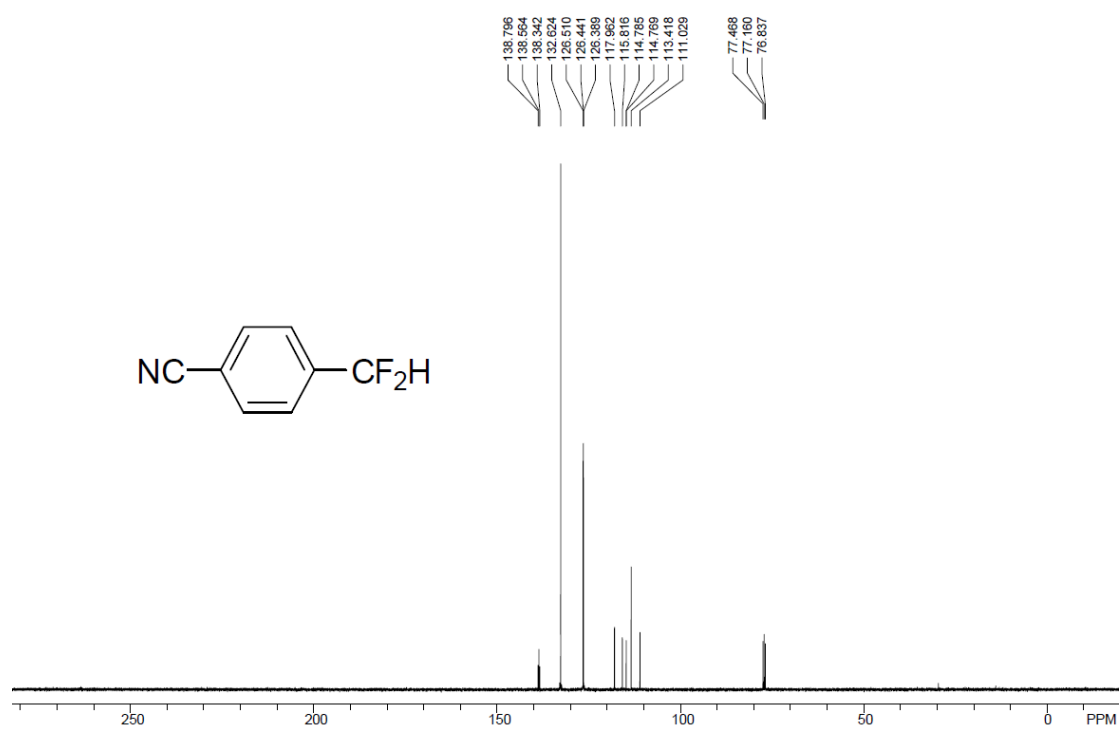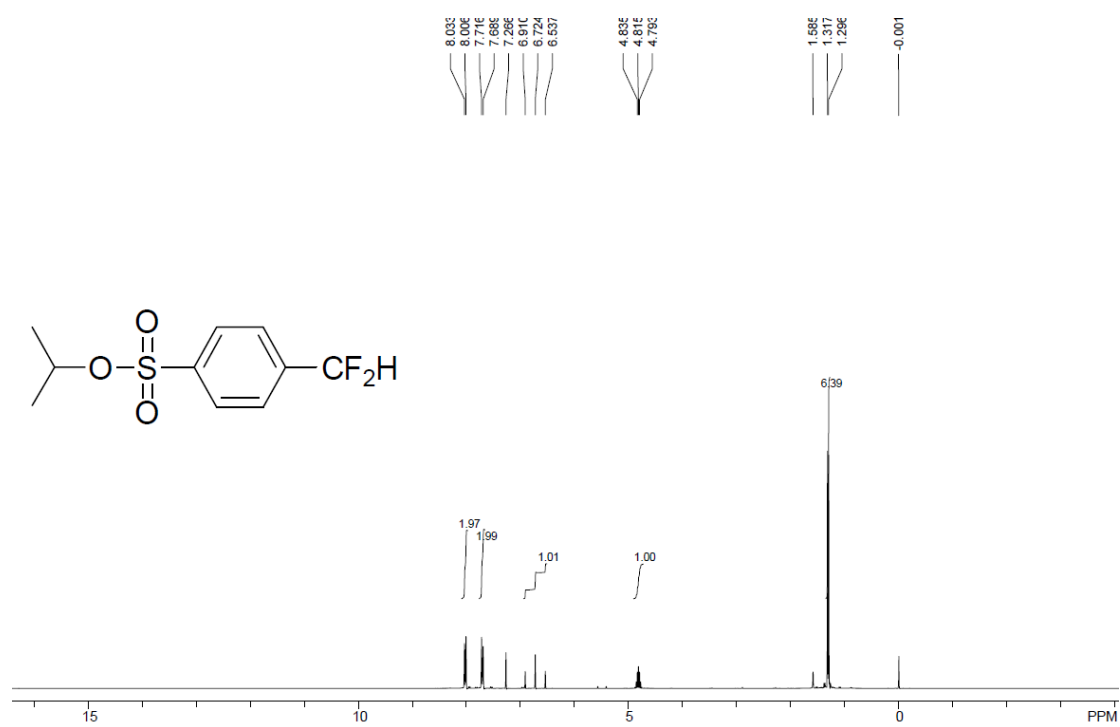

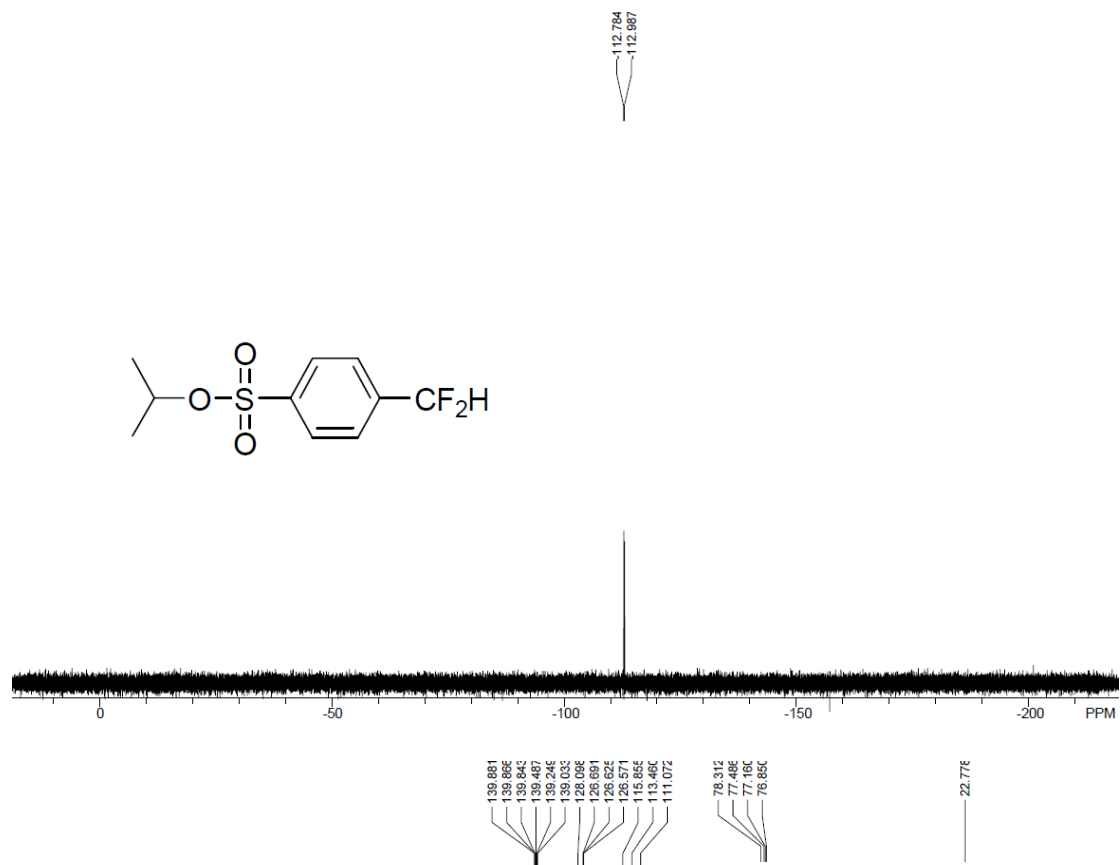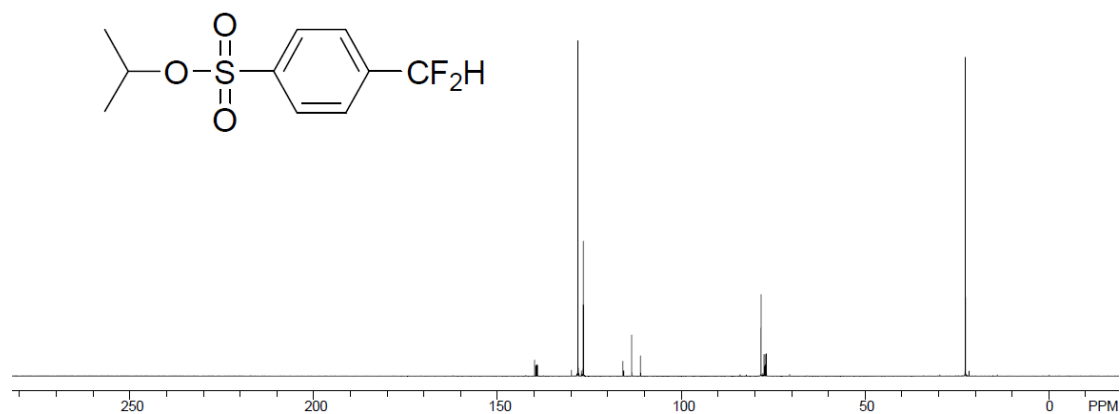

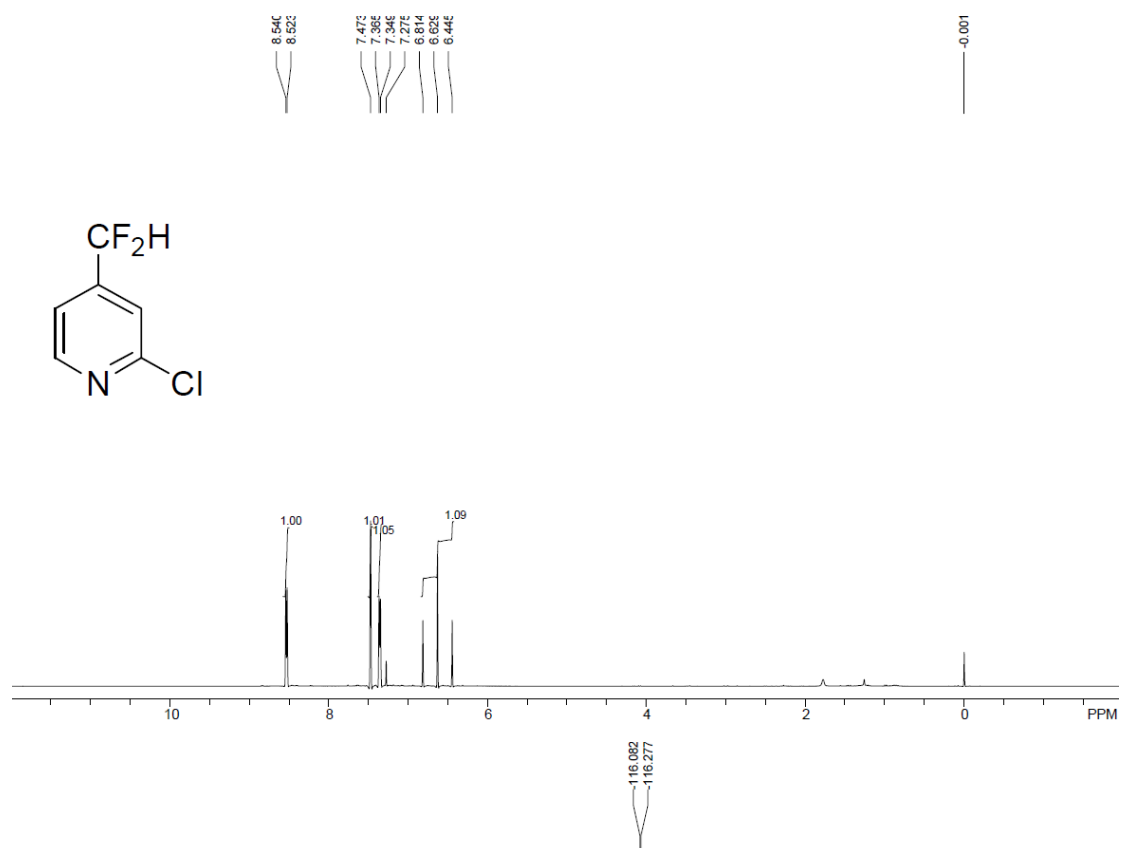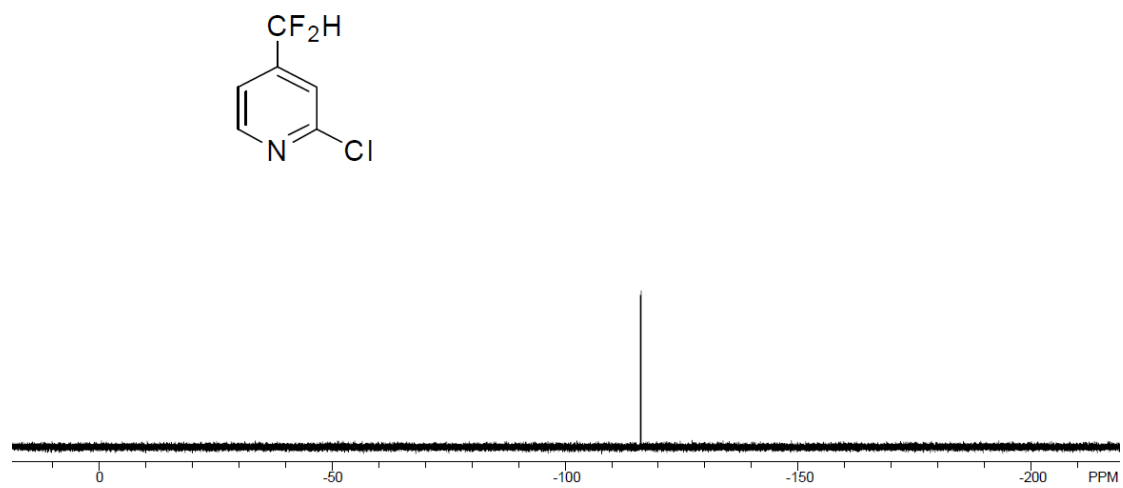

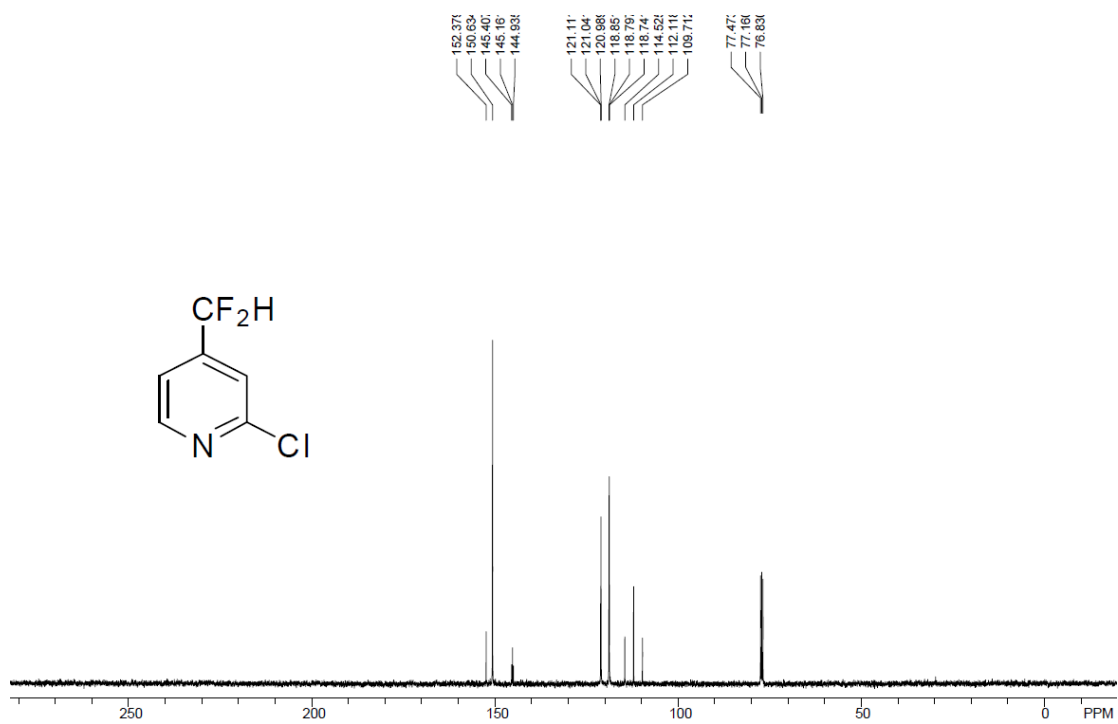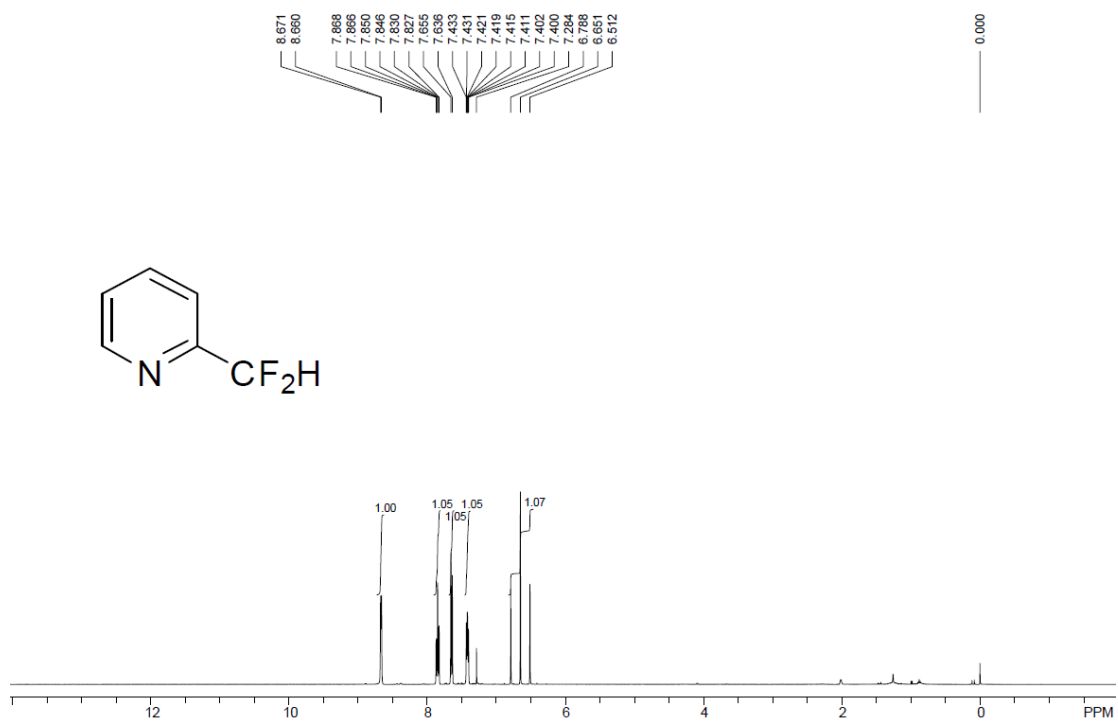

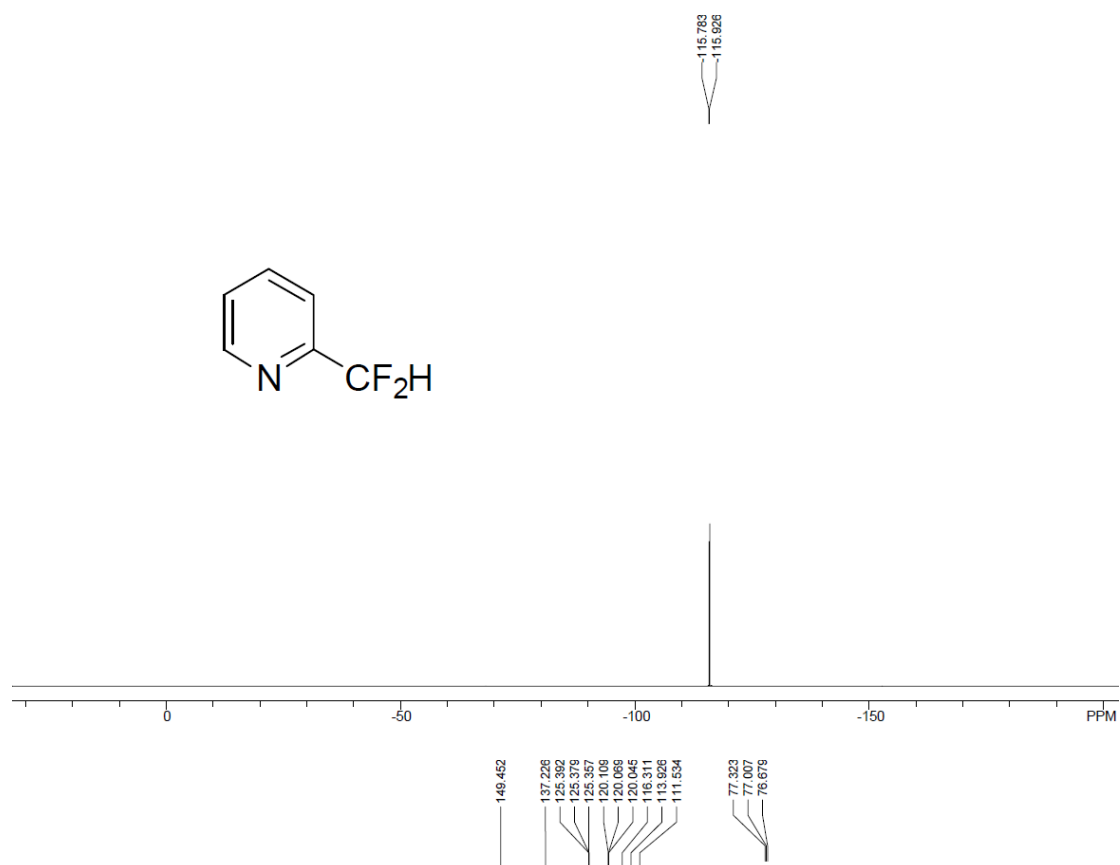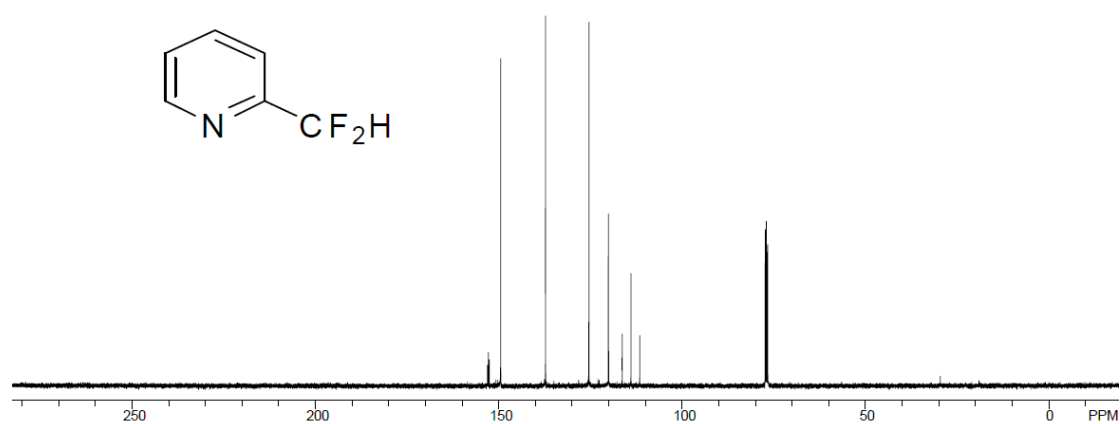

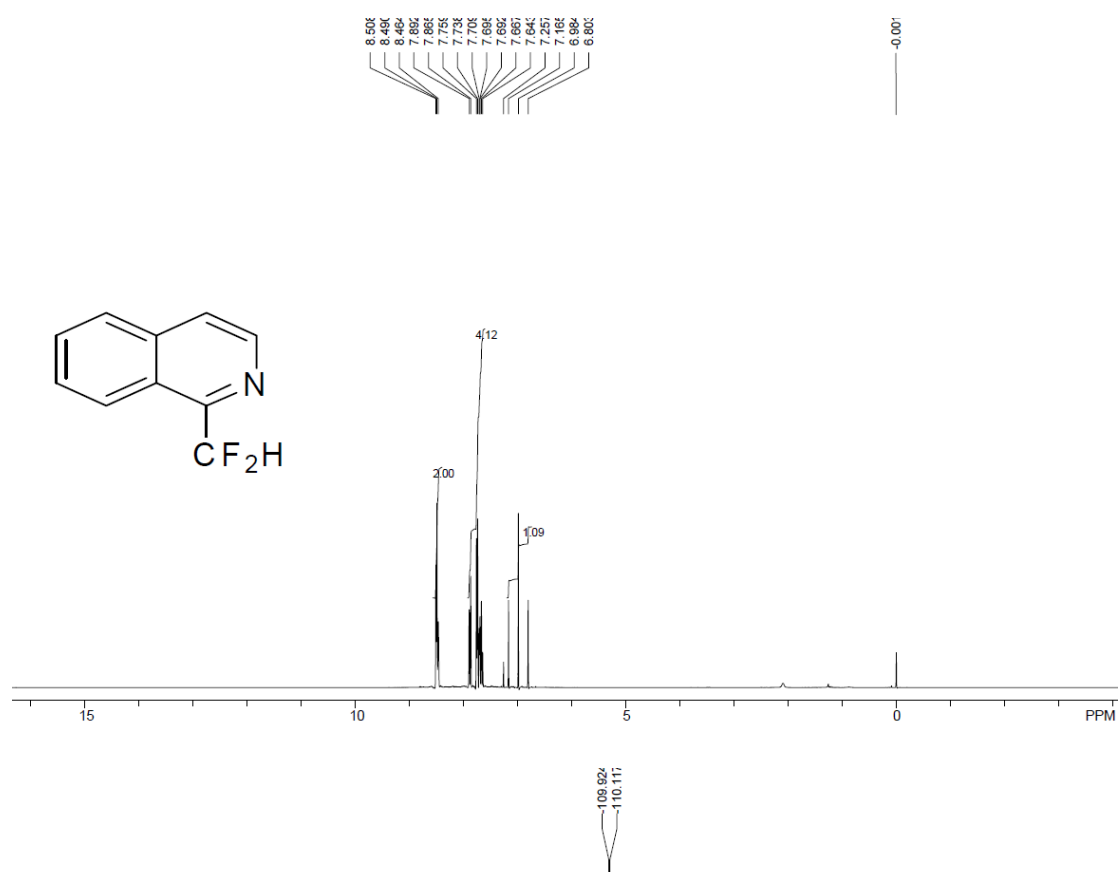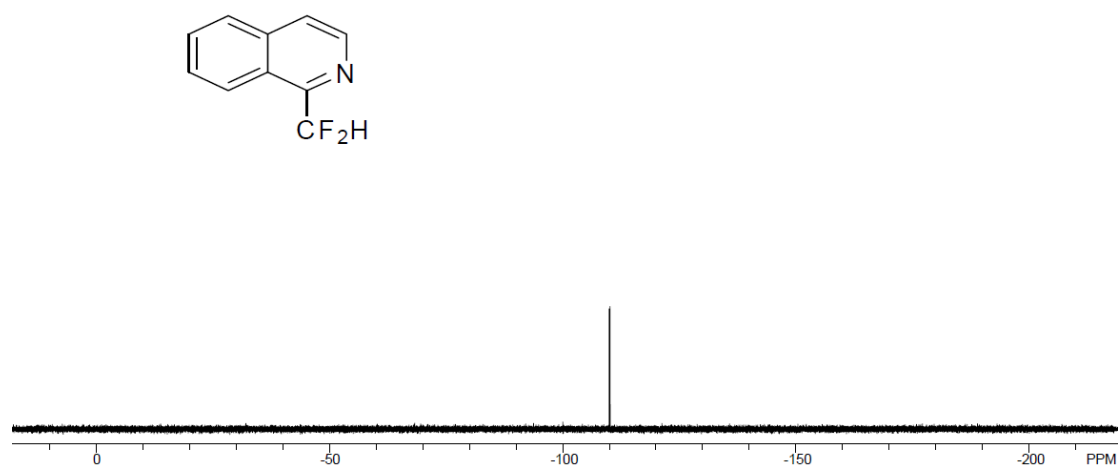

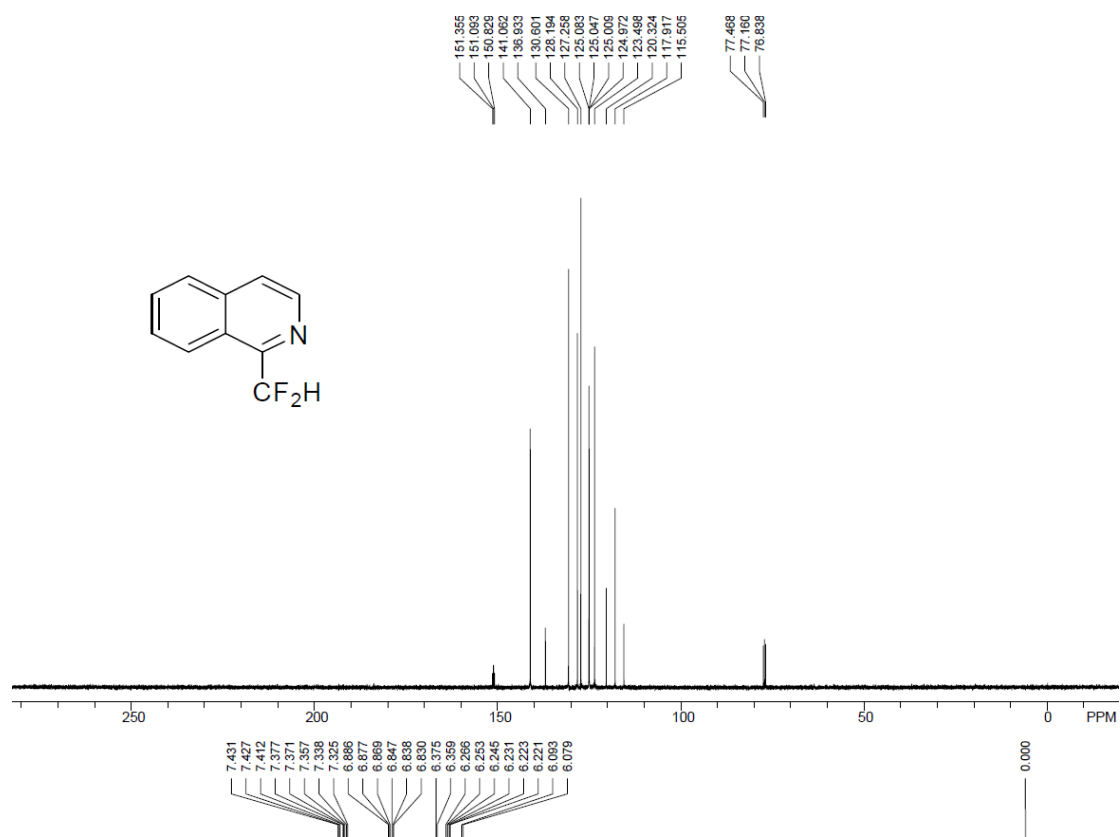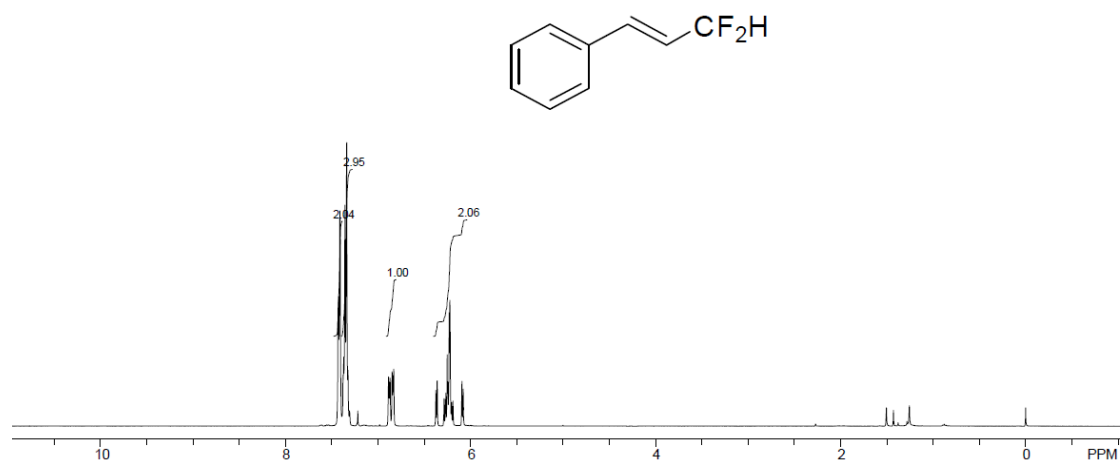

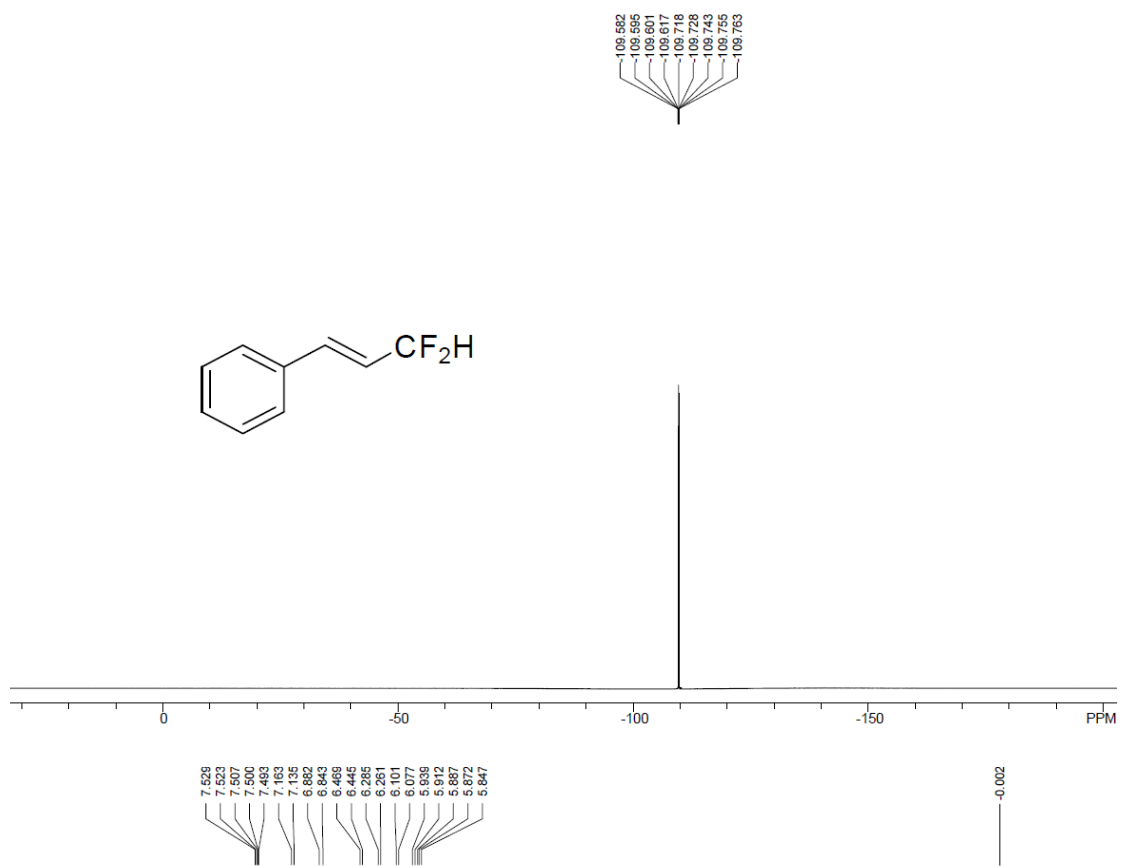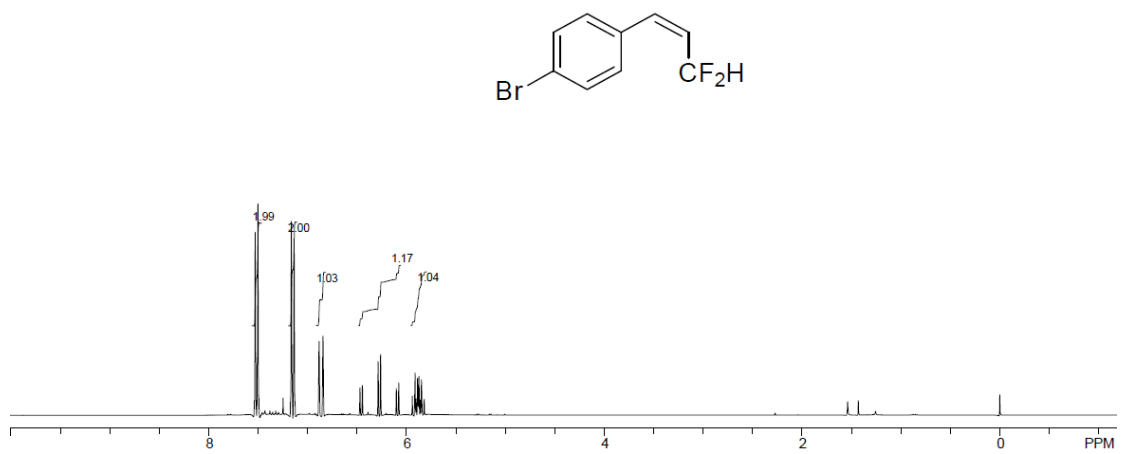

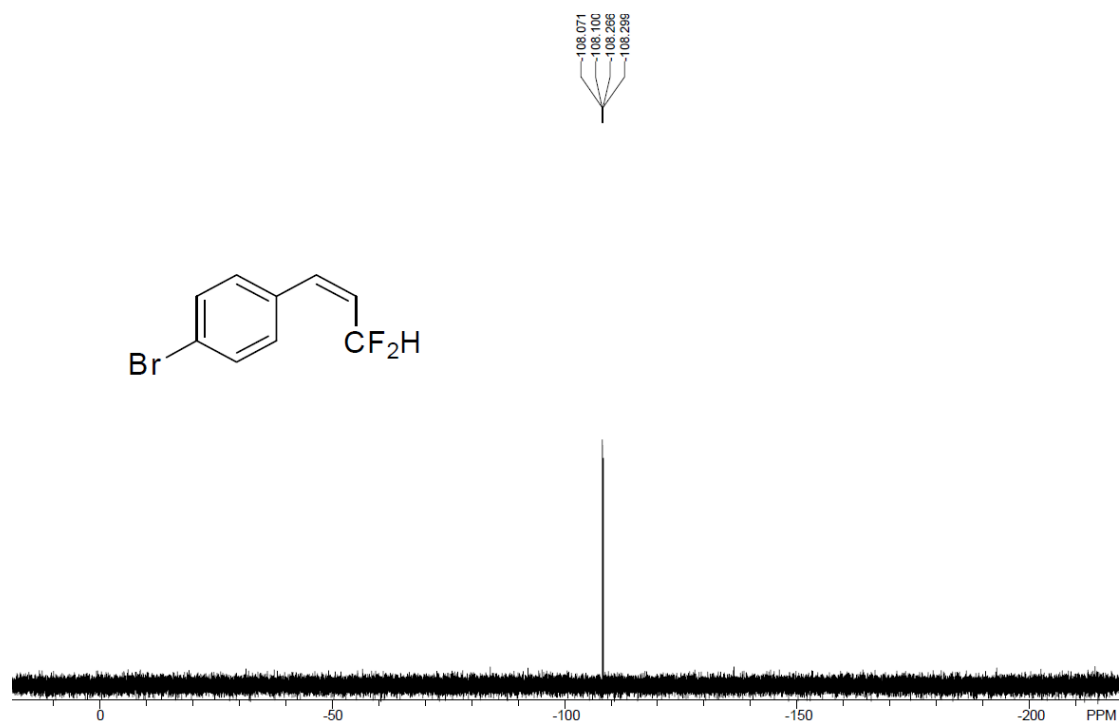

Supplement: c4qo00153b1.pdf [file c4qo00153b1.pdf]
